# Supplementary material for: Community-Level Response of Fishes and Aquatic Macroinvertebrates to Stream Restoration in a Third-Order Tributary of the Potomac River, USA
Source: Hindawi journal article supplement (doi:10.1155/2012/753634), 2011-12-06
Supplement: f1 [file 753634.f1.pdf]

Appendix I: Map of the restoration reach, two control reaches, and two reference reaches in the Cacapon River. Upstream control (impaired reach, but not receiving restoration) denoted 'UC' (39°5'47.95"N, 78°34'28.26"W), downstream control denoted 'DC' (39°7'48.99"N, 78°33'19.10"W). Upstream reference (unimpaired, natural reach) denoted 'UR' (39°5'57.81"N, 78°34'26.39"W), downstream reference denoted 'DR' (39°7'22.21"N, 78°33'25.15"W). The restoration reach denoted 'Re' (39°6'38.77"N, 78°33'32.70"W).

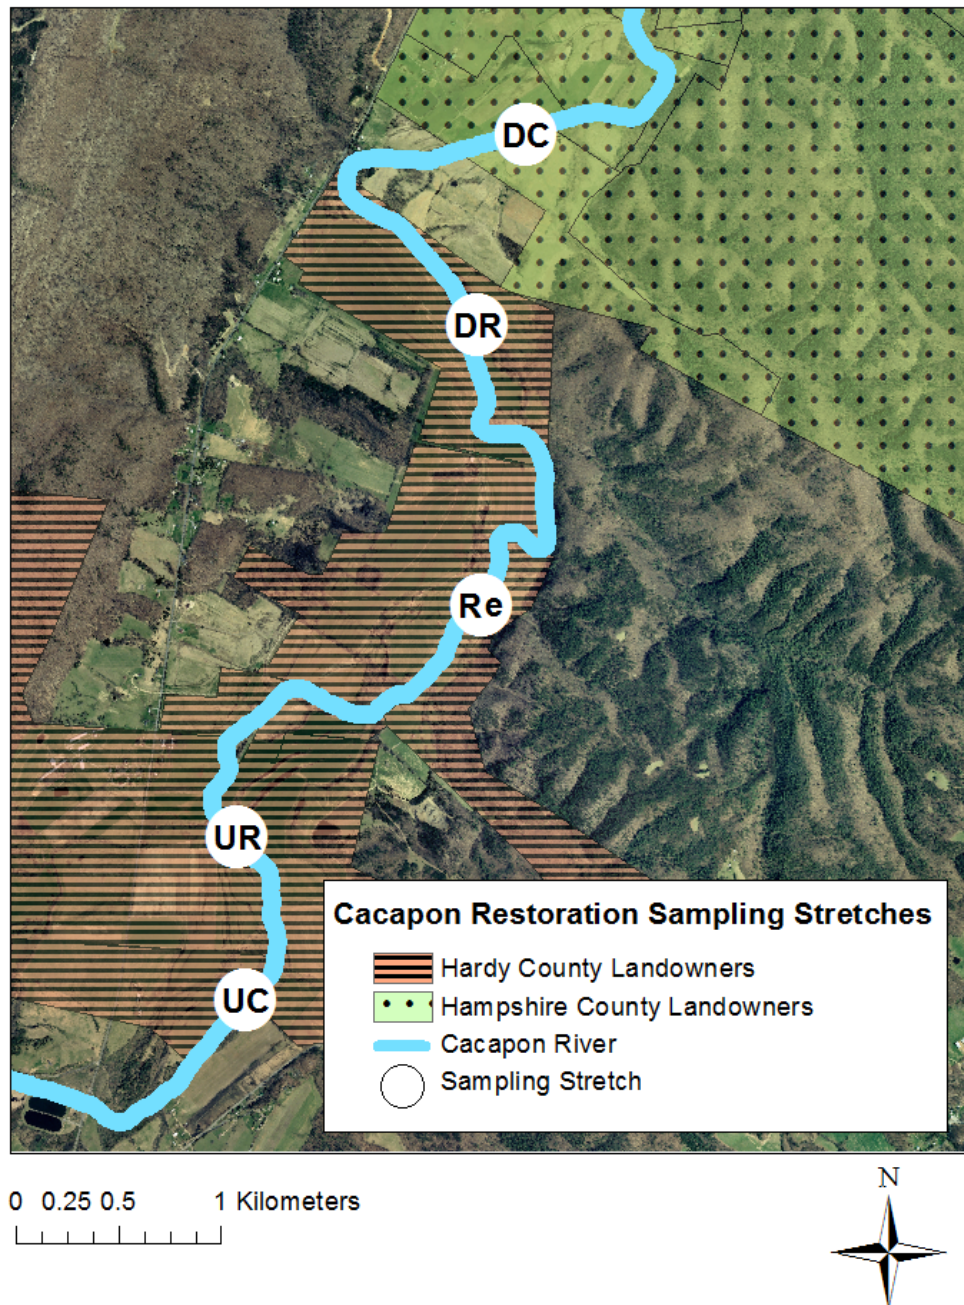

Appendix II: Rapid visual habitat assessment (RVHA) scores, following Barbour et al. (1999), for the five Cacapon restoration project sampling reaches, taken Summer 2009. The metrics for riffle-dominated rivers include: epifaunal substrate and available cover (EPI), embeddedness (EMB), velocity and depth combinations (VDC), sediment deposition (SDE), channel flow status (CFS), channel alteration (CAL), frequency of riffles (FRI), bank stability (BST), vegetative protection (VPR), and riparian zone width (RZW). Upstream control (impaired reach, but not receiving restoration) denoted 'UC', downstream control denoted 'DC'. Upstream reference (unimpaired, natural reach) denoted 'UR', downstream reference denoted 'DR'. The restoration reach denoted 'Re'.

| Reach | EPI | EMB | VDC | SDE | CFS | CAL | FRI | BST | VPR | RZW | Total |
|-------|-----|-----|-----|-----|-----|-----|-----|-----|-----|-----|-------|
| UC    | 13  | 16  | 16  | 16  | 12  | 17  | 13  | 13  | 10  | 13  | 139   |
| UR    | 14  | 14  | 15  | 15  | 14  | 17  | 13  | 17  | 17  | 16  | 152   |
| Re    | 12  | 15  | 18  | 17  | 14  | 17  | 13  | 9   | 13  | 8   | 136   |
| DC    | 16  | 13  | 12  | 16  | 13  | 17  | 13  | 13  | 14  | 9   | 136   |
| DR    | 14  | 16  | 14  | 18  | 19  | 17  | 13  | 16  | 18  | 18  | 163   |

Appendix III: Plantings in zone A (water edge to top of bank) and zone B (above bank) of the Cacapon River, West Virginia, USA restoration reach. Woody vegetation species were planted to establish a riparian buffer, to reduce erosion and runoff on the newly constructed banks. The number of each species planted on the right and left banks (when facing downstream) are given. A species listed as a pollinator species (Pol. spp) provides food for honeybees and other economically important pollinators.

| Species- Zone A                                 | No. planted |      | Tree/ Shrub | Pol. spp? |
|-------------------------------------------------|-------------|------|-------------|-----------|
|                                                 | Right       | Left |             |           |
| Sycamore ( <i>Platanus occidentalis</i> )       | 25          | 0    | Tree        | no        |
| Cottonwood ( <i>Populus deltoides</i> )         | 26          | 24   | Tree        | no        |
| River birch ( <i>Betula nigra</i> )             | 0           | 0    | Tree        | no        |
| Elderberry ( <i>Sambucus canadensis</i> )       | 50          | 50   | Shrub       | yes       |
| Black Willow ( <i>Salix nigra</i> )             | 0           | 25   | Tree        | no        |
| Silky cornel ( <i>Cornus amomum</i> )           | 25          | 25   | Shrub       | yes       |
| Streamside alder ( <i>Alnus serrulata</i> )     | 40          | 30   | Shrub       | no        |
| Buttonbush ( <i>Cephalanthus occidentalis</i> ) | 99          | 51   | Shrub       | yes       |
| Total                                           | 265         | 205  |             |           |

Appendix III cont.

| Species - Zone B                                                | No. Planted |      | Tree/Shrub | Pol. spp? |
|-----------------------------------------------------------------|-------------|------|------------|-----------|
|                                                                 | Right       | Left |            |           |
| Redbud ( <i>Cercis canadensis</i> )                             | 70          | 30   | Shrub      | yes       |
| Winterberry ( <i>Ilex verticillata</i> )                        | 60          | 40   | Shrub      | yes       |
| Spicebush ( <i>Calycanthus floridus</i> )                       | 70          | 30   | Shrub      | yes       |
| Serviceberry ( <i>Amelanchier leavis</i> )                      | 0           | 0    | Tree       | yes       |
| Swamp White Oak ( <i>Quercus bicolor</i> )                      | 100         | 48   | Tree       | no        |
| Swamp Oak ( <i>Quercus palustris</i> )                          | 60          | 40   | Tree       | no        |
| Bailey Red Snowberry ( <i>Symphoricarpus orbiculatus</i> )      | 0           | 0    | Shrub      | no        |
| Nannyberry ( <i>Viburnum lentago</i> )                          | 0           | 0    | Shrub      | yes       |
| Ninebark ( <i>Physocarpus opulifolius</i> )                     | 0           | 0    | Shrub      | yes       |
| Shrubby St. johnswort ( <i>Hypericum prolificum</i> )           | 0           | 0    | Shrub      | yes       |
| Gray dogwood ( <i>Cornus racemosa</i> )                         | 60          | 40   | Shrub      | yes       |
| Persimmon ( <i>Diospyros virginiana</i> )                       | 75          | 0    | Tree       | no        |
| Choke cherry ( <i>Prunus virginiana</i> )                       | 60          | 40   | Shrub      | yes       |
| Black haw ( <i>Viburnum prunifolium</i> )                       | 60          | 40   | Shrub      | yes       |
| American basswood ( <i>Tilia americana</i> )                    | 80          | 40   | Tree       | yes       |
| Wild plum ( <i>Prunus americana</i> )                           | 50          | 0    | Shrub      | yes       |
| Virginia rose ( <i>Rosa virginiana</i> )                        | 0           | 0    | Shrub      | yes       |
| Smooth arrowwood ( <i>Viburnum recognitum</i> )                 | 0           | 0    | Shrub      | yes       |
| Rough arrowwood ( <i>Viburnum dentatum</i> )                    | 68          | 32   | Shrub      | yes       |
| Black chokeberry ( <i>Aronia melanocarpa</i> )                  | 0           | 0    | Shrub      | yes       |
| Meadowsweet ( <i>Spiraea alba</i> )                             | 0           | 0    | Shrub      | yes       |
| Steeplebush ( <i>Spiraea tomentosa</i> )                        | 0           | 0    | Shrub      | yes       |
| Fringetree ( <i>Chionanthus virginicus</i> )                    | 0           | 0    | Shrub      | yes       |
| Wild crabapple ( <i>Malus coronaria</i> var. <i>coronaria</i> ) | 67          | 0    | Shrub      | yes       |
| Hawthornes ( <i>Crataegus</i> spp.)                             | 0           | 0    | Tree       | yes       |
| Total                                                           | 880         | 380  |            |           |

Appendix IV: List of aquatic macroinvertebrates collected from all sampling reaches in the Cacapon River with associated functional feeding groups (Mandaville 2002).

| Taxon           | Genera | FFG    | Total | Taxon             | Genera | FFG   | Total |
|-----------------|--------|--------|-------|-------------------|--------|-------|-------|
| Aeshnidae       | 1      | PR     | 2     | Lepidostomatidae  | 1      | SH    | 1     |
| Amphipoda       | 1      | CG     | 51    | Leptoceridae      | 1      | PR    | 21    |
| Ancylidae       | 2      | SC     | 56    | Leptohyphidae     | 1      | CG    | 116   |
| Athericidae     | 1      | PR     | 217   | Leptophlebiidae   | 1      | CG    | 19    |
| Baetidae        | 3      | CG     | 2272  | Lestidae          | 2      | PR    | 4     |
| Baetiscidae     | 1      | CG     | 4     | Leuctridae        | 3      | SH    | 145   |
| Blephariceridae | 1      | SC     | 5     | Limnephilidae     | 4      | SH    | 34    |
| Brachycentridae | 3      | SH, CF | 78    | Lymnaeidae        | 1      | CG    | 72    |
| Caenidae        | 1      | CG     | 428   | Molannidae        | 1      | SC    | 1     |
| Cambaridae      | 2      | CG     | 12    | Nemouridae        | 2      | SH    | 61    |
| Capniidae       | 3      | SH     | 253   | Odontoceridae     | 1      | SC    | 1     |
| Chaoboridae     | 1      | PR     | 1     | Oligochaeta       | 1      | CG    | 116   |
| Chironomidae    | 4      | CG     | 3293  | Perlidae          | 6      | PR    | 115   |
| Coenagrionidae  | 3      | PR     | 117   | Perlodidae        | 4      | PR    | 38    |
| Corbiculidae    | 1      | CF     | 376   | Philopotamidae    | 2      | CF    | 1389  |
| Corydalidae     | 3      | PR     | 702   | Physidae          | 1      | CG    | 8     |
| Dryopidae       | 1      | SC     | 22    | Planorbidae       | 1      | SC    | 2     |
| Elmidae         | 3      | SC     | 4417  | Pleuroceridae     | 1      | SC    | 673   |
| Empididae       | 1      | PR     | 64    | Polycentropodidae | 1      | PR    | 22    |
| Ephemerellidae  | 6      | CG, SC | 2710  | Polymitarcyidae   | 1      | CG    | 17    |
| Ephemeridae     | 2      | CG     | 17    | Potamanthidae     | 1      | CG    | 228   |
| Gerridae        | 1      | PR     | 12    | Psephenidae       | 2      | SC    | 2095  |
| Gomphidae       | 4      | PR     | 78    | Pteronarcyidae    | 1      | SH    | 17    |
| Gyrinidae       | 2      | PR     | 52    | Pyalidae          | 1      | SC    | 2     |
| Haliplidae      | 1      | SH     | 1     | Rhyacophilidae    | 1      | PR    | 14    |
| Heptageniidae   | 2      | SC     | 2374  | Sialidae          | 1      | PR    | 36    |
| Hirudinea       | 1      | PR     | 12    | Simuliidae        | 1      | CF    | 2065  |
| Hydroarachnidia | 1      | PR     | 1     | Sphaeriidae       | 1      | CF    | 90    |
| Hydropsychidae  | 2      | CF     | 2509  | Tabanidae         | 1      | CG    | 1     |
| Hydrophilidae   | 1      | CG     | 2     | Taeniopterygidae  | 2      | SH    | 27    |
| Hydroptilidae   | 1      | SC     | 31    | Tipulidae         | 2      | SH,CG | 114   |
| Isonychiidae    | 1      | CF     | 2420  | Uenoidae          | 1      | SC    | 351   |
| Isopoda         | 1      | CG     | 2     | Veliidae          | 1      | PR    | 2     |

CG=Collector-gatherer

CF=Collector-filterer

PR=Predator

SC=Scraper

SH=Shredder

Appendix V: Pearson's correlation coefficients and associated permutational p-values (1000 randomizations) for relations between fish (Daniels et al. 2002) and macroinvertebrate indices of biotic integrity metrics and nonmetric multidimensional scaling (NMDS) ordination for the communities sampled during the summers of 2009 and 2010 from the Cacapon River, West Virginia, USA.

| Community         | Metric                    | Vector $r^2$ | P-value |
|-------------------|---------------------------|--------------|---------|
| Macroinvertebrate | Total genera              | 0.458        | 0.119   |
|                   | Total taxa                | 0.348        | 0.212   |
|                   | EPT taxa                  | 0.425        | 0.143   |
|                   | Percent EPT               | 0.114        | 0.658   |
|                   | Percent Chironomidae      | 0.580        | 0.044   |
|                   | Percent dominant 2 taxa   | 0.584        | 0.040   |
|                   | Hilsenhoff Biotic Index   | 0.931        | 0.001   |
|                   | Abundance                 | 0.664        | 0.025   |
| Fish              | Total richness            | 0.425        | 0.150   |
|                   | Benthic insectivores      | 0.010        | 0.967   |
|                   | Water column spp.         | 0.290        | 0.282   |
|                   | Terete minnows            | 0.416        | 0.141   |
|                   | Percent dominant          | 0.436        | 0.126   |
|                   | Percent <i>Catostomus</i> | 0.001        | 0.902   |
|                   | Percent generalist        | 0.223        | 0.386   |
|                   | Percent insectivores      | 0.073        | 0.768   |
|                   | Per. top carnivores       | 0.002        | 0.995   |
|                   | Abundance                 | 0.181        | 0.484   |
|                   | Per. juv. and adult       | 0.420        | 0.134   |
|                   | Percent anomalies         | 0.706        | 0.001   |

Appendix VI: List of fish species collected during electrofishing in the Cacapon River at all sampling reaches, 2009-2010.

| Family                                  | Common name         | Scientific name                 | Total | Locations      |
|-----------------------------------------|---------------------|---------------------------------|-------|----------------|
| Catostomidae                            | White sucker        | <i>Catostomus commersoni</i>    | 49    | All            |
| Catostomidae                            | Northern hogsucker  | <i>Hypentelium nigricans</i>    | 41    | All            |
| Catostomidae                            | Golden redhorse     | <i>Moxostoma erythrurum</i>     | 9     | UC, DC, DR     |
| Catostomidae                            | Shorthead redhorse  | <i>Moxostoma macrolepidotum</i> | 3     | DR             |
| Centrarchidae                           | Rock bass           | <i>Ambloplites rupestris</i>    | 43    | All            |
| Centrarchidae                           | Redbreast sunfish   | <i>Lepomis auritus</i>          | 241   | All            |
| Centrarchidae                           | Green sunfish       | <i>Lepomis cyanellus</i>        | 5     | DC             |
| Centrarchidae                           | Pumpkinseed         | <i>Lepomis gibbosus</i>         | 6     | UR, DC, DR     |
| Centrarchidae                           | Bluegill            | <i>Lepomis macrochirus</i>      | 11    | UR, Re, DC, DR |
| Centrarchidae                           | Longear sunfish     | <i>Lepomis megalotis</i>        | 4     | UR, Re, DC     |
| Centrarchidae                           | Smallmouth bass     | <i>Micropterus dolomieu</i>     | 22    | All            |
| Centrarchidae                           | Largemouth bass     | <i>Micropterus salmoides</i>    | 3     | DC             |
| Cottidae                                | Blue ridge sculpin  | <i>Cottus caeruleomentum</i>    | 110   | All            |
| Cottidae                                | Potomac sculpin     | <i>Cottus girardi</i>           | 32    | UC, UR, Re, DR |
| Cyprinidae                              | Central stoneroller | <i>Camptostoma anomalum</i>     | 48    | UC, UR, Re, DR |
| Cyprinidae                              | Spotfin shiner      | <i>Cyprinella spiloptera</i>    | 20    | UC, UR, Re, DC |
| Cyprinidae                              | Cutlips minnow      | <i>Exoglossum maxillingua</i>   | 7     | UR, Re, DR     |
| Cyprinidae                              | Common shiner       | <i>Luxilus cornutus</i>         | 3     | Re, DR         |
| Cyprinidae                              | River chub          | <i>Nocomis micropogon</i>       | 2     | UC, UR         |
| Cyprinidae                              | Comely shiner       | <i>Notropis amoenus</i>         | 33    | UC, RF         |
| Cyprinidae                              | Silverjaw minnow    | <i>Notropis buccatus</i>        | 2     | DR             |
| Cyprinidae                              | Rosyface shiner     | <i>Notropis rubellus</i>        | 186   | All            |
| Cyprinidae                              | Mimic shiner        | <i>Notropis volucellus</i>      | 18    | UR, Re, DR     |
| Cyprinidae                              | Bluntnose minnow    | <i>Pimephales notatus</i>       | 934   | All            |
| Cyprinidae                              | Blacknose dace      | <i>Rhinichthys atratulus</i>    | 21    | UC, UR, Re, DR |
| Cyprinidae                              | Longnose dace       | <i>Rhinichthys cataractae</i>   | 35    | UC, UR, Re, DR |
| Cyprinidae                              | Creek chub          | <i>Semotilus atromaculatus</i>  | 48    | UR, Re, DC, DR |
| Cyprinidae                              | Fallfish            | <i>Semotilus corporalis</i>     | 77    | All            |
| Ictaluridae                             | Yellow bullhead     | <i>Ameiurus natalis</i>         | 24    | UR, Re, DC, DR |
| Ictaluridae                             | Margined madtom     | <i>Noturus insignis</i>         | 8     | All            |
| Percidae                                | Greenside darter    | <i>Etheostoma blennoides</i>    | 22    | All            |
| Percidae                                | Fantail darter      | <i>Etheostoma flabellare</i>    | 63    | All            |
| Percidae                                | Tessellated darter  | <i>Etheostoma olmstedii</i>     | 175   | All            |
| UC = upstream control (impaired reach)  |                     | DC = downstream control         |       |                |
| UR = upstream reference (natural reach) |                     | DR = downstream reference       |       |                |
| Re = restoration reach                  |                     | All= all five reaches           |       |                |
